# Supplementary material for: Cost-effectiveness of infliximab versus conventional combination treatment in methotrexate-refractory early rheumatoid arthritis: 2-year results of the register-enriched randomised controlled SWEFOT trial
Source: HighWire-hosted journal article supplement (doi:10.1136/annrheumdis-2013-205060), 2014-04-16
Supplement: annrheumdis-2013-205060supp.pdf [file annrheumdis-2013-205060supp.pdf]

# Supplementary Material

## Cost-Effectiveness of Infliximab versus Conventional Combination Treatment in Methotrexate-Refractory Early Rheumatoid Arthritis: 2-Year Results of the Register-Enriched Randomised Controlled SWEFOT Trial

Jonas K Eriksson<sup>\*,1</sup>, Johan A Karlsson<sup>\*,2</sup>, Johan Bratt<sup>3</sup>, Ingemar F Petersson<sup>2,4</sup>, Ronald F van Vollenhoven<sup>5</sup>, Sofia Ernestam<sup>6</sup>, Pierre Geborek<sup>\*\*,2</sup> & Martin Neovius<sup>\*\*,1</sup>

<sup>\*,\*\*</sup> Contributed equally

<sup>1</sup>Clinical Epidemiology Unit, Department of Medicine, Karolinska Institutet, Stockholm, Sweden

<sup>2</sup>Section of Rheumatology, Department of Clinical Sciences Lund, Lund University, Lund, Sweden

<sup>3</sup>Rheumatology Unit, Department of Medicine, Karolinska Institutet, Stockholm, Sweden

<sup>4</sup>Section of Orthopedics, Department of Clinical Sciences Lund, Lund University, Lund, Sweden

<sup>5</sup>ClinTRID, Department of Medicine, Karolinska Institutet, Stockholm, Sweden

<sup>6</sup>Department of Learning, Informatics and Medical Education (LIME), Karolinska Institutet, Stockholm, Sweden

### Table of Contents

|                                                                                                                 |        |
|-----------------------------------------------------------------------------------------------------------------|--------|
| <b>Figure S1</b> Distributions of costs and effects, and the incremental costs and effects of bootstrap samples | Page 2 |
| <b>Figure S2</b> Flow chart of the Swefot trial                                                                 | Page 3 |
| <b>Figure S3</b> Mean accumulated costs and adjusted mean differences                                           | Page 4 |
| <b>Figure S4</b> Bootstrapped incremental cost-effectiveness ratio plots in unadjusted analysis                 | Page 5 |
| <b>Figure S5</b> Cost-effectiveness acceptability curves in unadjusted analysis                                 | Page 6 |
| <b>Table S1</b> Incremental costs, effects and cost-effectiveness ratios in unadjusted analysis                 | Page 7 |

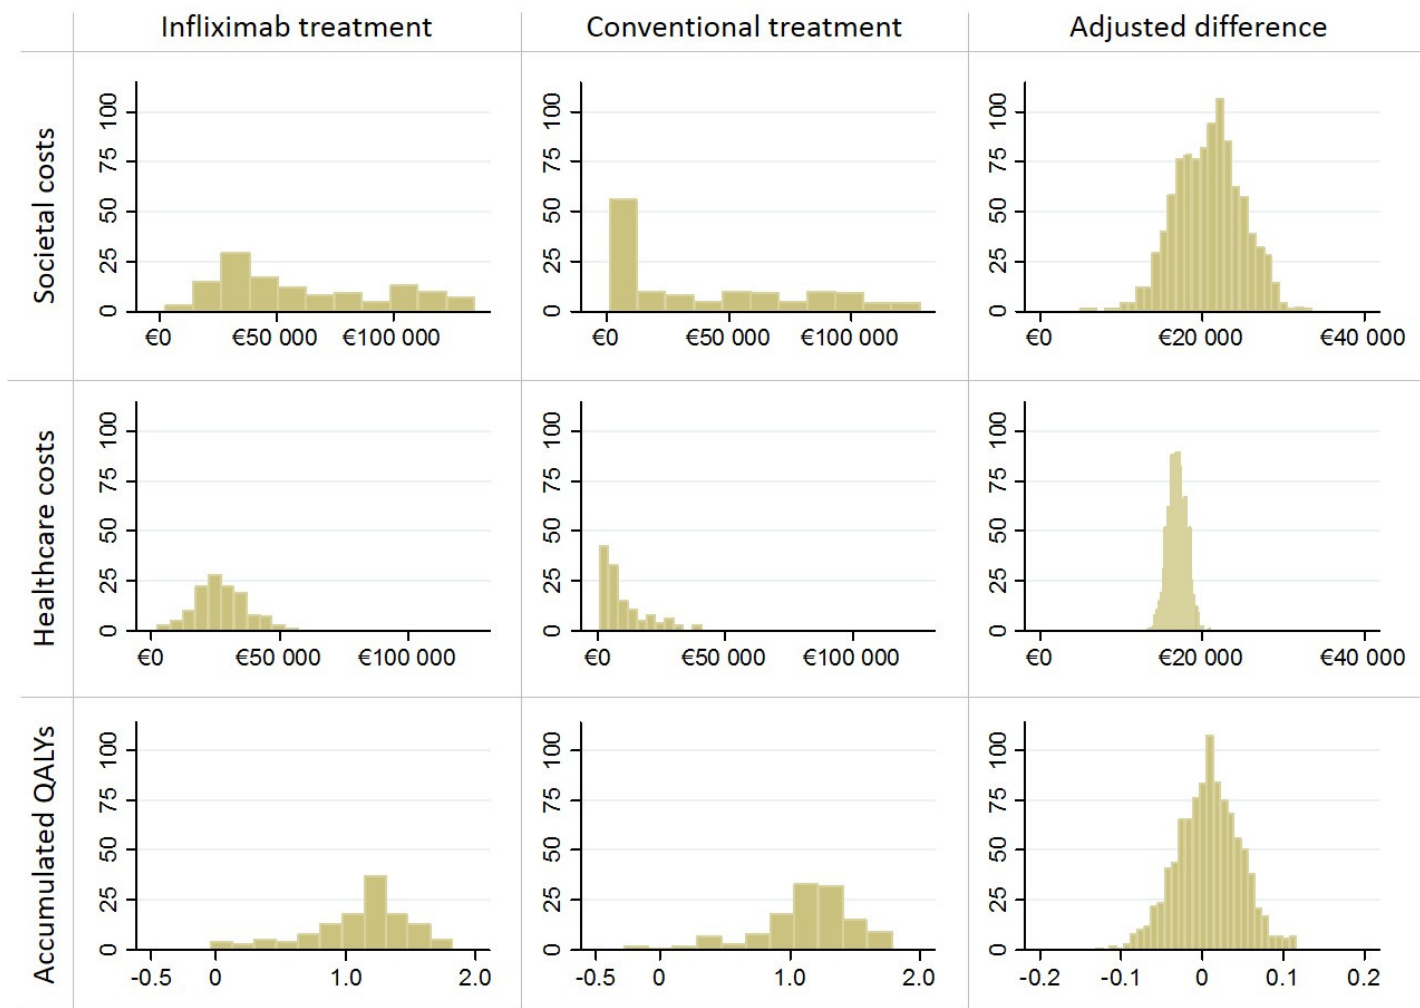

**Figure S1** Distribution of societal costs, healthcare costs, accumulated QALYs (UK EQ-5D preference set), and the adjusted difference in bootstrap samples (y-axis represents number of patients)

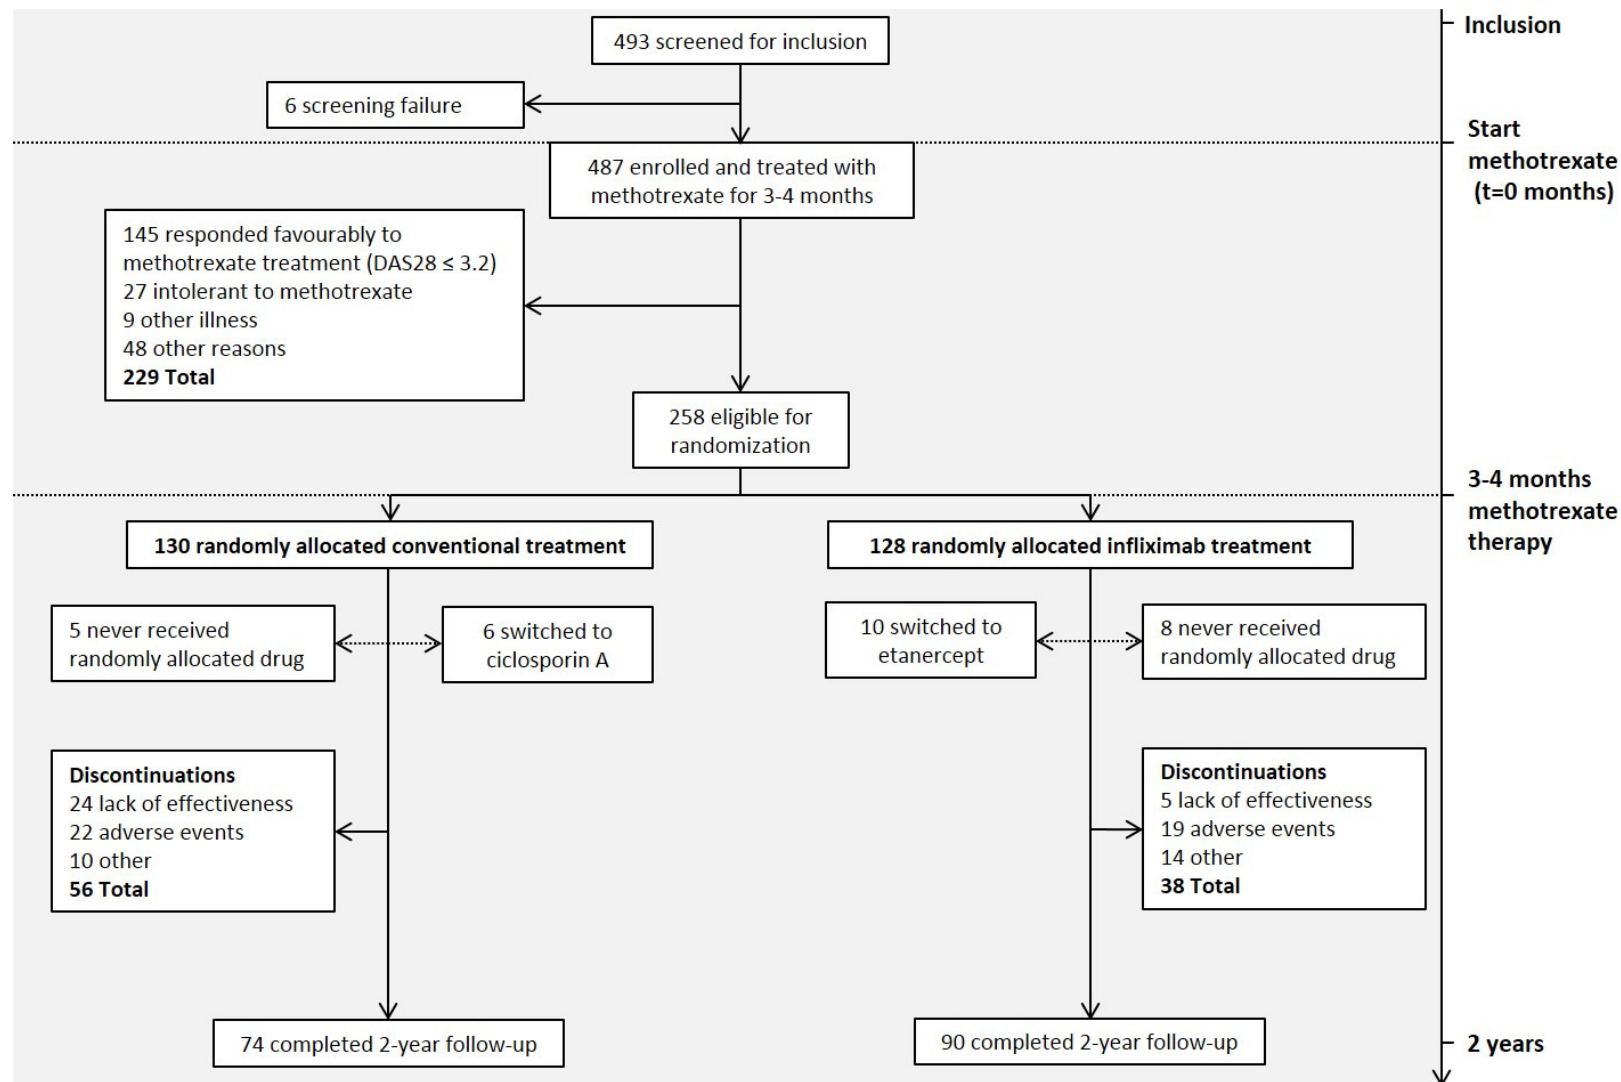

**Figure S2** Flow chart of the Swefot trial

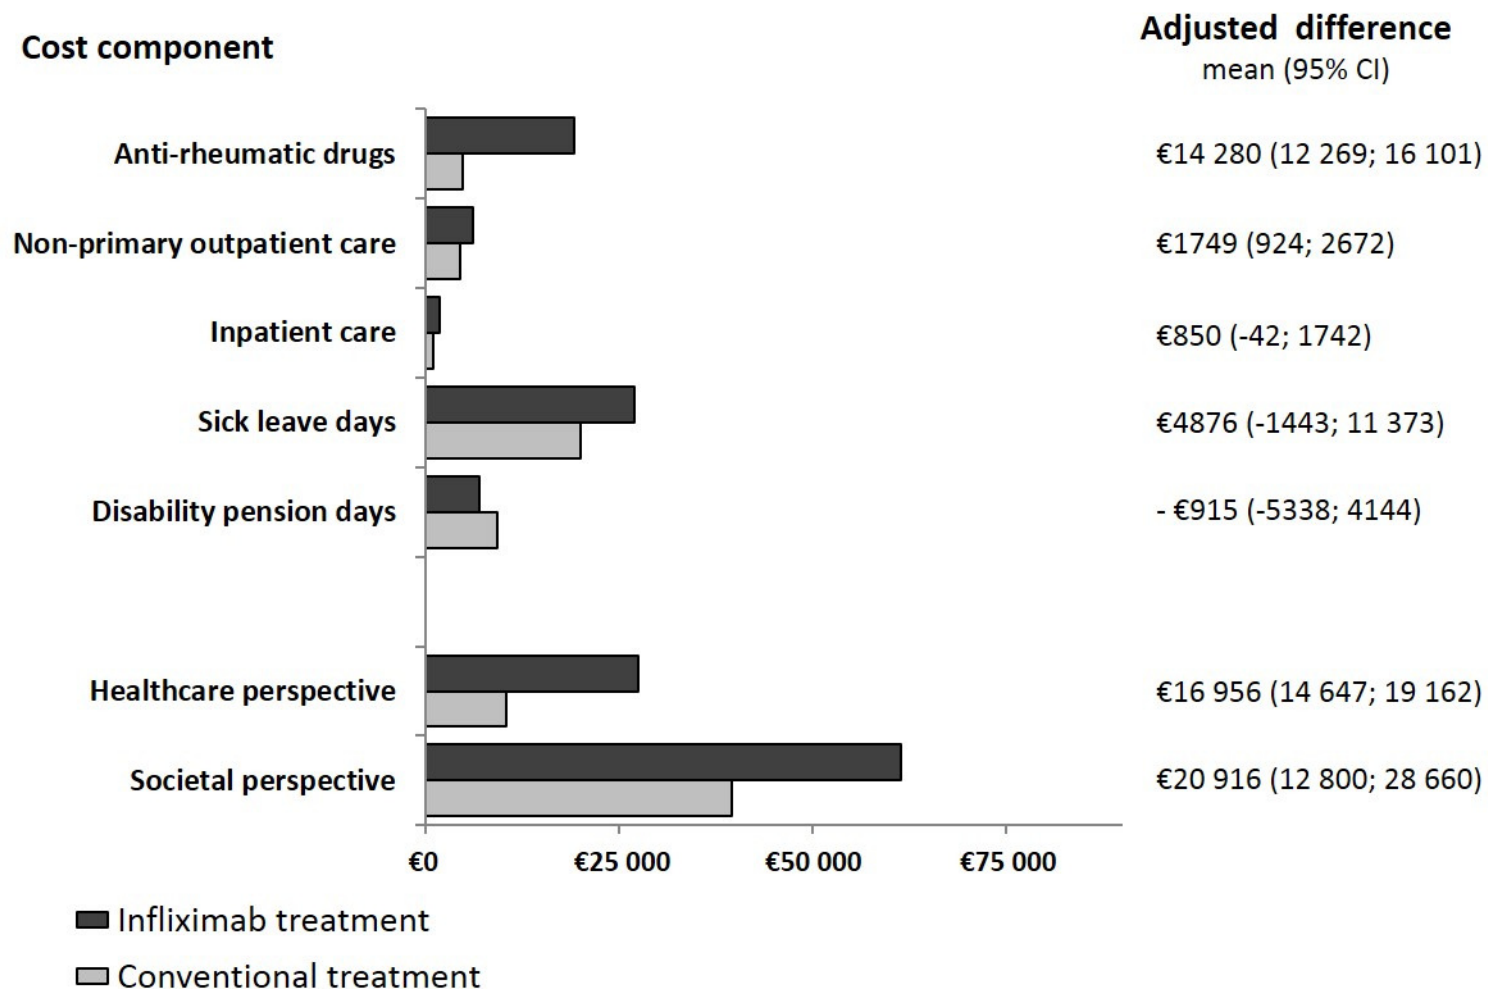

**Figure S3** Mean accumulated costs and adjusted mean differences over 21 months of follow-up for the infliximab versus the conventional treatment strategy

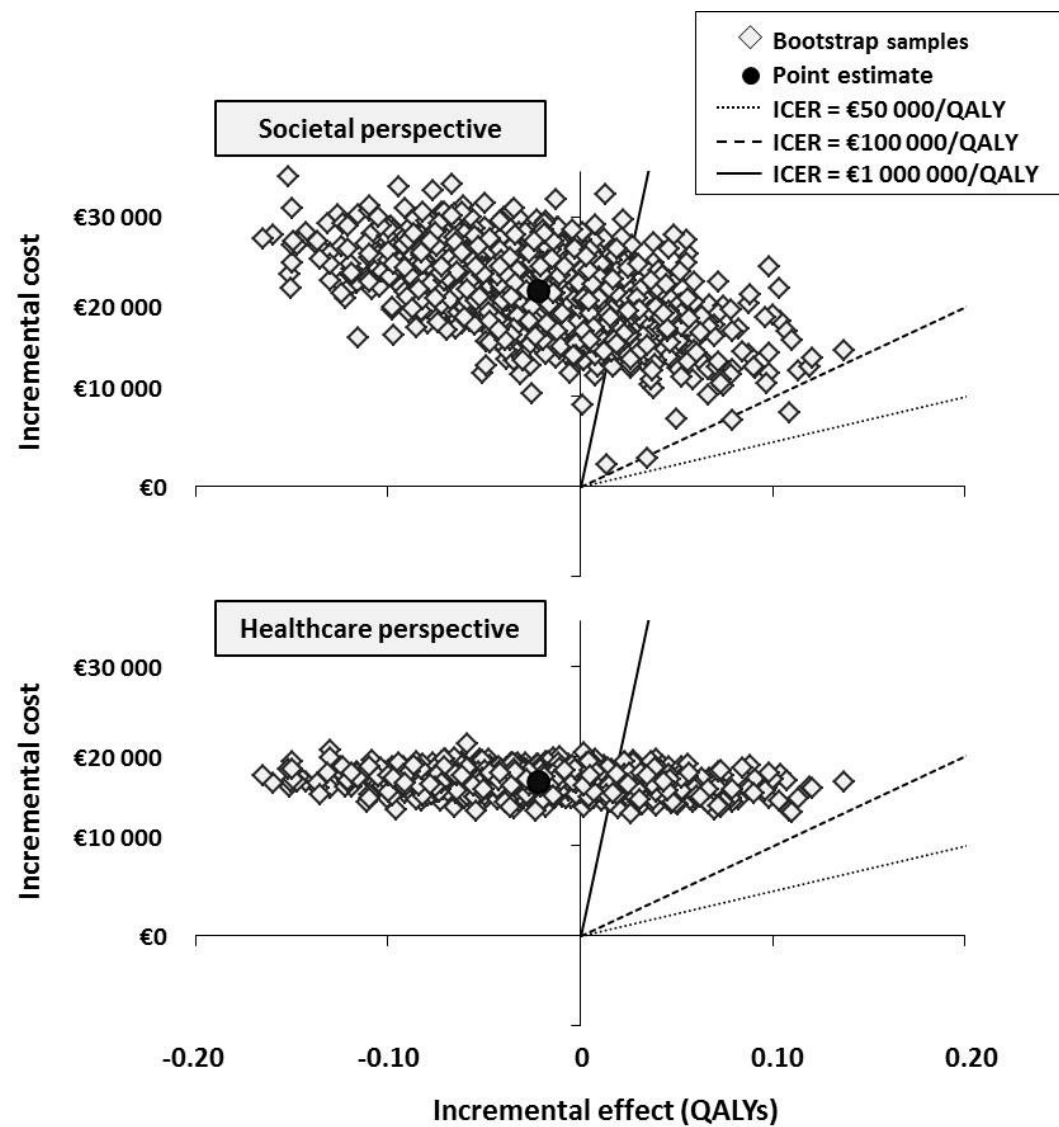

**Figure S4** UNADJUSTED ANALYSIS: Bootstrapped incremental cost-effectiveness ratio plots

by societal and healthcare perspective for the infliximab versus the conventional treatment strategy

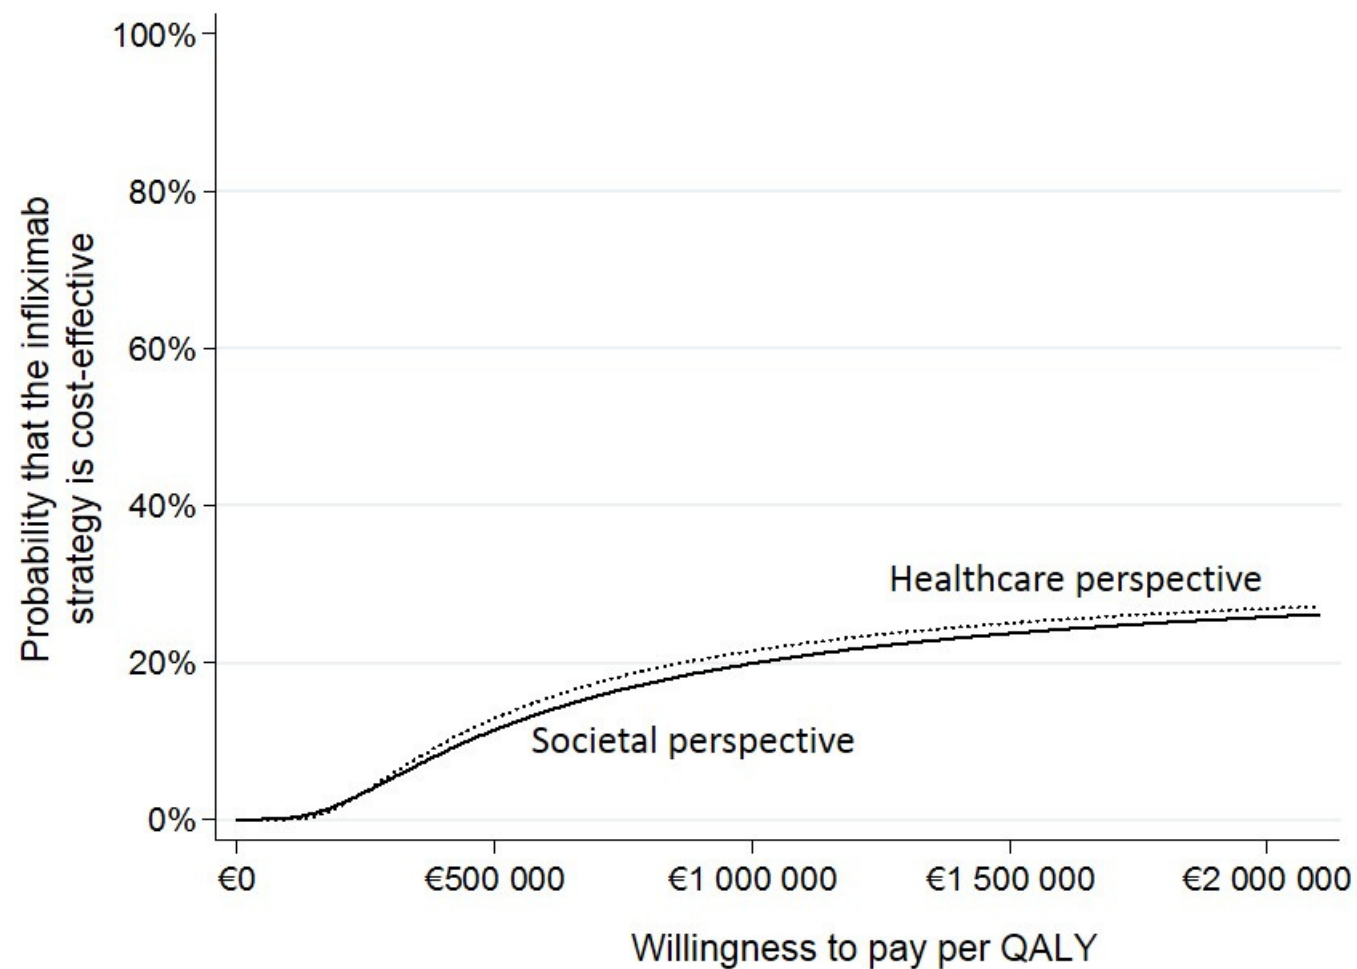

**Figure S5 UNADJUSTED ANALYSIS:** Cost-effectiveness acceptability curves by societal and healthcare perspective for the infliximab versus the conventional treatment strategy



**Table S1** UNADJUSTED ANALYSIS: Mean costs, effects and cost-effectiveness ratios by the societal and healthcare perspective of the infliximab versus the conventional treatment strategy

| Perspective/method     | N   | Mean difference in cost (€) | Mean difference in effect (QALY) | ICER (€/QALY) | % cost-effective at willingness to pay per QALY |          |            |
|------------------------|-----|-----------------------------|----------------------------------|---------------|-------------------------------------------------|----------|------------|
|                        |     |                             |                                  |               | €50 000                                         | €100 000 | €1 000 000 |
| Societal perspective   |     |                             |                                  |               |                                                 |          |            |
| Overall                | 258 | 21 707                      | -0.022                           | -             | 0%                                              | 0%       | 20%        |
| Sensitivity analysis   |     |                             |                                  |               |                                                 |          |            |
| - Friction cost method | 258 | 19 703                      | -0.022                           | -             | 0%                                              | 0%       | 21%        |
| - US EQ-5D             | 258 | 21 707                      | -0.011                           | -             | 0%                                              | 0%       | 18%        |
| Healthcare perspective |     |                             |                                  |               |                                                 |          |            |
| Overall                | 258 | 17 124                      | -0.022                           | -             | 0%                                              | 0%       | 22%        |
| Sensitivity analysis   |     |                             |                                  |               |                                                 |          |            |
| - US EQ-5D             | 258 | 17 124                      | -0.011                           | -             | 0%                                              | 0%       | 20%        |

ICER = Incremental cost-effectiveness ratio

QALY = Quality-adjusted life-year

EQ-5D = EuroQol 5 dimensions
